# Supplementary material for: Healthcare providers' perceptions of maternal and newborn care quality in the West Bank, Palestine: a qualitative study
Source: Research Square preprint supplement (doi:10.21203/rs.3.rs-5989286/v1), 2025-08-13
Supplement: Supplementary file 1 [file d4b6ca4537b8b77678774175.docx]

**Additional File 1**
**Interview Guide (English)**

**I. Demographic and background questions**

1. What is your profession? (e.g., Doctor, Midwife)
2. How long have you been working in maternity services?
3. Which of the following best describes your current workplace? (e.g., Hospital/Labor, Primary Care, Government/Private)

**II. Interview Questions**

**1. Experience and practical aspects**

1. Can you describe your overall experience as a maternal healthcare provider?
   - What are the positive aspects of your experience regarding the quality of maternal and neonatal care in your region?
   - What are the negative aspects of your experience regarding the quality of maternal and neonatal care in your region?
   - What conditions or types of support do you think are necessary to improve pregnancy, labor, and postnatal health services?
   - What conditions or types of support do you think are necessary to enhance prenatal and neonatal services?
2. Regarding your practical experience, how do you promote physiological processes during pregnancy, labor, and the postnatal period?
   - What strategies or practices could be implemented to facilitate the promotion of normal processes?
   - What is your experience with managing complications, making referrals, and collaborating with other professionals? Are there areas for improvement?
   - Can you discuss your experiences with medical interventions?
     - Are there cases where you used medical interventions that you believe were not necessary?
     - Are there cases where you did not use medical interventions but believe they were needed?
     - Can you provide examples and the frequency of such cases?
   - What is your experience with evidence-based care?
     - When should evidence-based care be provided, and what barriers do you encounter in delivering it? Can you provide examples?

**2. Organization of healthcare**

1. What are your thoughts on access to care for women in your region?
   - How do you assess the continuity of care throughout pregnancy, labor, and the postnatal period?
   - Are you able to follow up with the same woman throughout her care? Can the woman you care for see you multiple times?
   - How would you describe the collaboration between hospitals and community services?
   - What is your experience with the available equipment, including basic furniture and monitoring devices like blood pressure monitors?
     - Are there any issues or challenges related to equipment availability or functionality?
     - How do these issues affect your ability to provide quality care?
     - What is your reaction to these challenges, and what message would you like to convey?

**3. Values in healthcare**

1. What is your experience with providing respectful care? How can we facilitate more respectful care?
   - Have you ever been unable to provide respectful care, or witnessed disrespectful care or abuse?
   - What opportunities do you see for involving the wider community in care and health education?

**4. Philosophy in healthcare**

1. How do you discuss the benefits and risks of medical interventions with mothers or their family members?
   - How can we improve shared decision-making processes?
   - In what ways could strengthening women’s capabilities be beneficial? How can we empower them?
   - What are the possibilities for providing culturally and psychologically appropriate care? Can you provide any examples?

**5. Interdisciplinary collaboration**

1. What is your experience with practicing your full scope of practice?
   - How would you describe the interdisciplinary collaboration and respect for autonomy in your work environment?
   - What barriers to effective collaboration and respect for autonomy have you encountered? What improvements could be made?
   - Do you have any examples of challenges in interdisciplinary collaboration? Is there anything else you would like to add?
